# Supplementary material
Source: publisher figshare collection journal article supplement (https://aacr.figshare.com/articles/dataset/_/22479617)
Supplement: Supplementary file 1 [file 39931115]

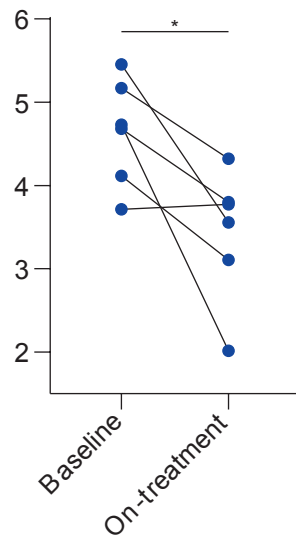

**Supplementary Figure 4. Cytotoxic lymphocytes between baseline and on-treatment.**

Cytotoxic lymphocytes (CTLs) in matched biopsies between baseline and on-treatment in non-responders with low inhibitory checkpoint expression statistically tested with the Wilcoxon signed-rank test.
